# Supplementary material for: Deep resequencing of the 1q22 locus in non-lobar intracerebral hemorrhage
Source: bioRxiv or medRxiv preprint supplement (doi:10.1101/2023.04.18.23288754), 2023-04-24
Supplement: Supplementary file [file media-1.pdf]

## Supplementary Material

**Supplementary Figure S1.** *Iq22* coverage analysis results. Average reads depth was calculated for each sample at each sequenced position. All the samples were characterized by low coverage, detected in a 1.6 kb region falling in an intronic region of *SEMA4A* gene (chr1:156,139,280 - 156,140,732) and in an intergenic region between *SEMA4A* and *SLC25A44* genes(chr1:156,147,543-156,163,730). Since affecting the entire cohort, it was considered as a technical bias.

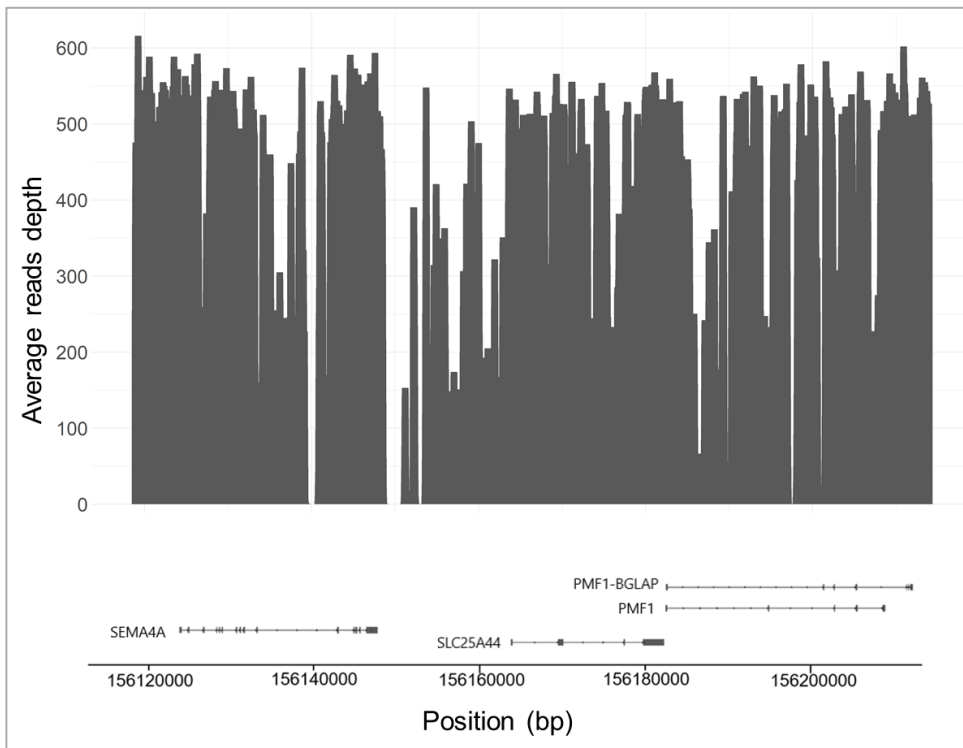

**Supplementary Figure S2.** P-values (left panel) and absolute  $\text{abs}(\log\text{OR})$  (right panel) of non-lobar ICH vs controls in meta-analysis by Woo et al (A) were compared with those resulting from Firth regression comparing non-lobar vs controls (B), non-lobar vs lobar and controls (C), non-lobar vs lobar and controls, adjusted for population stratification (D), lobar vs controls (E).

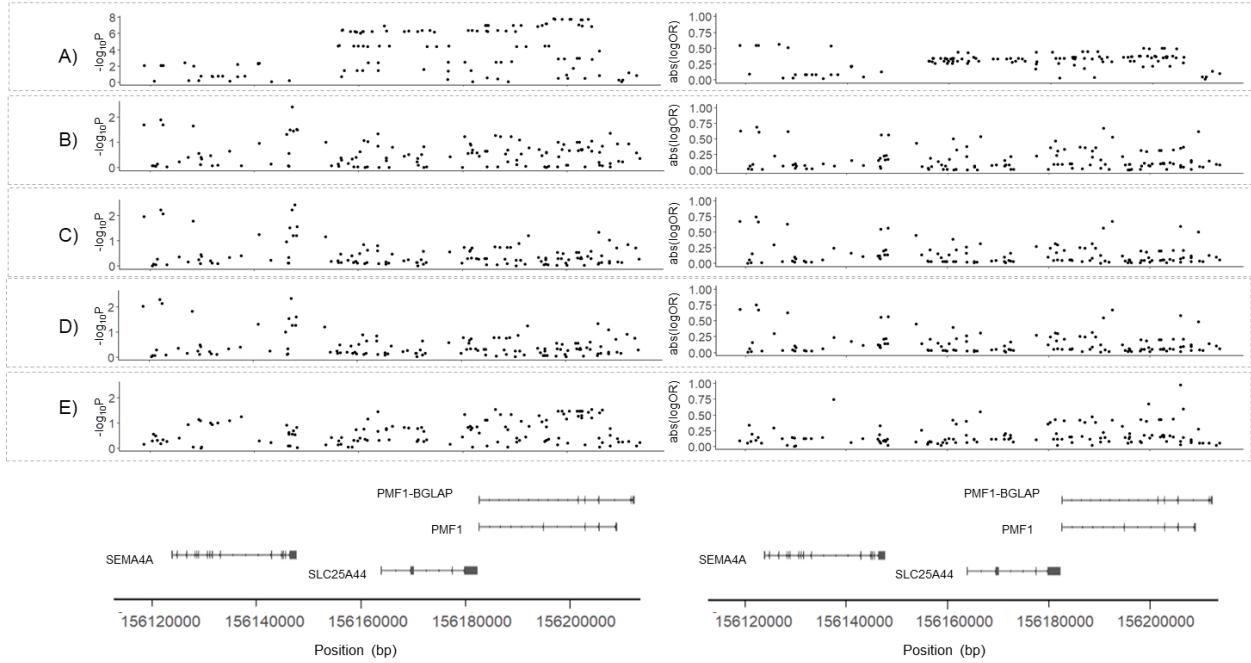

**Supplementary Figure S3.** Fine-mapping results. Posterior Inclusion Probabilities (PIPs) are reported for PAINTOR (A), SuSIE (B), FINEMAP (C) and Caviar (D) analyses.

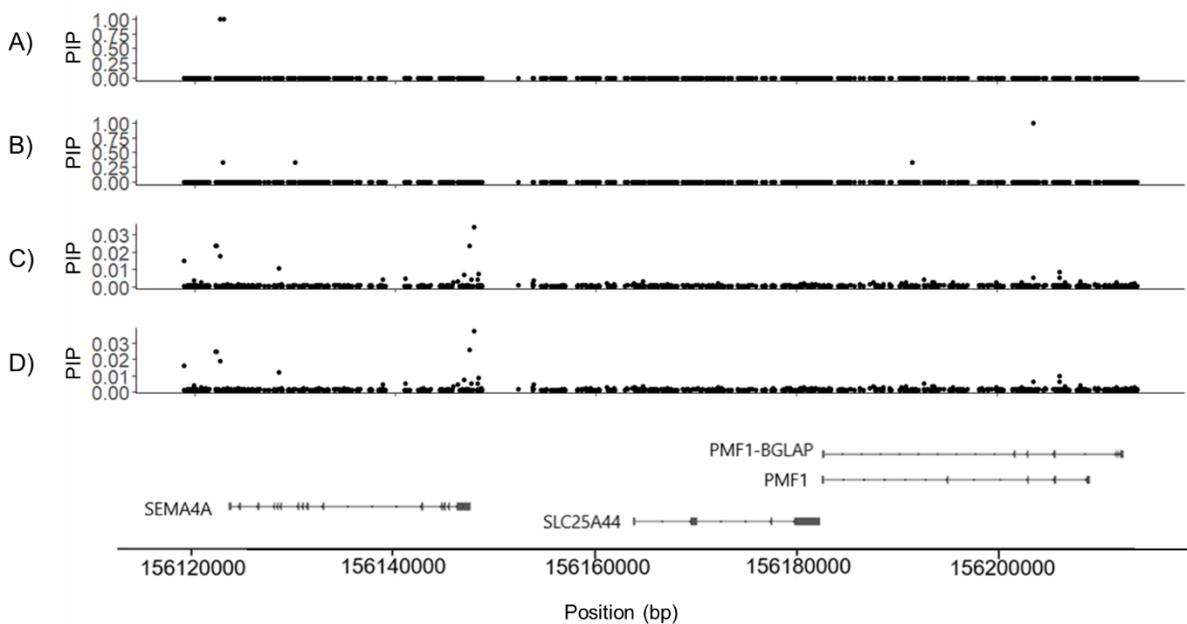

**Supplementary Table 1.** Variants used as genetic instruments in MVMR analyses are reported with correspondent betas (relative to effect alleles) and standard errors (SE).

| SNP         | Effect allele | Other allele | Beta nonlobarICH | SE nonlobarICH | Beta <i>SEMA4A</i> | SE <i>SEMA4A</i> | Beta <i>SLC25A44</i> | SE <i>SLC25A44</i> | Beta <i>PMF1</i> | SE <i>PMF1</i> |
|-------------|---------------|--------------|------------------|----------------|--------------------|------------------|----------------------|--------------------|------------------|----------------|
| rs112223391 | A             | G            | -0.29            | 0.07           | 0.35               | 0.01             | -0.04                | 0.01               | -0.12            | 0.01           |
| rs1543294   | T             | C            | 0.04             | 0.07           | -0.01              | 0.01             | -0.06                | 0.01               | 0.08             | 0.01           |
| rs2241106   | G             | C            | 0.06             | 0.07           | 0.30               | 0.01             | 0.01                 | 0.01               | 0.02             | 0.01           |
| rs56410778  | C             | T            | -0.04            | 0.23           | 0.38               | 0.03             | -0.03                | 0.03               | -0.15            | 0.04           |
| rs72710255  | G             | A            | 0.08             | 0.09           | 0.10               | 0.01             | 0.01                 | 0.01               | 0.02             | 0.01           |
| rs4661035   | G             | A            | -0.04            | 0.23           | 0.19               | 0.03             | 0.00                 | 0.03               | -0.04            | 0.03           |
| rs16837430  | A             | T            | -0.01            | 0.09           | -0.07              | 0.01             | -0.02                | 0.01               | 0.00             | 0.01           |
| rs73006728  | A             | G            | -0.54            | 0.21           | -0.15              | 0.02             | -0.07                | 0.02               | -0.07            | 0.03           |
| rs2985714   | A             | G            | 0.25             | 0.10           | 0.08               | 0.01             | 0.00                 | 0.01               | 0.02             | 0.02           |
| rs28662267  | C             | T            | -0.08            | 0.07           | -0.05              | 0.01             | 0.00                 | 0.01               | 0.00             | 0.01           |
| rs2075163   | G             | T            | 0.02             | 0.18           | 0.12               | 0.02             | -0.08                | 0.02               | -0.04            | 0.02           |
| rs72704176  | T             | C            | -0.11            | 0.24           | -0.18              | 0.03             | -0.06                | 0.03               | -0.03            | 0.04           |
| rs1800247   | C             | T            | -0.13            | 0.07           | 0.01               | 0.01             | -0.07                | 0.01               | -0.04            | 0.01           |
